1 **A requirement for Potassium and Calcium Channels during the Endosomal Trafficking**  
2 **of Polyomavirus Virions**

3 Samuel J. Dobson<sup>1</sup>, Jamel Mankouri<sup>1,2</sup> and Adrian Whitehouse<sup>1,2,\*</sup>

4

5 <sup>1</sup>School of Molecular and Cellular Biology, Faculty of Biological Sciences, <sup>2</sup>Astbury Centre  
6 for Structural Molecular Biology, University of Leeds, Leeds, United Kingdom

7

8

9

10 \*Correspondence to Adrian Whitehouse

11 Tel: +44 (0) 113 3437096

12 Email: a.whitehouse@leeds.ac.uk

13

14 No. of pages: 21

15 No. of Figures: 8

16

17

18 **Keywords:** DNA viruses, polyomavirus, ion channels

19 **ABSTRACT**

20 Following internalisation viruses have to escape the endocytic pathway and deliver their  
21 genomes to initiate replication. Members of the *Polyomaviridae* transit through the  
22 endolysosomal network and through the endoplasmic reticulum (ER), from which heavily  
23 degraded capsids escape into the cytoplasm prior to nuclear entry. Acidification of  
24 endosomes and ER entry are essential in the lifecycle of polyomaviruses, however many  
25 mechanistic requirements are yet to be elucidated. Alteration of endocytic pH relies upon the  
26 activity of ion channels. Using two polyomaviruses with differing capsid architecture, namely  
27 Simian virus 40 (SV40) and Merkel cell polyomavirus (MCPyV), we firstly describe methods  
28 to rapidly quantify infection using an IncuCyte ZOOM instrument, prior to investigating the  
29 role of K<sup>+</sup> and Ca<sup>2+</sup> channels during early stages of infection. Broad spectrum inhibitors  
30 identified that MCPyV, but not SV40, is sensitive to K<sup>+</sup> channel modulation. In contrast, both  
31 viruses are restricted by the broad spectrum Ca<sup>2+</sup> channel inhibitor verapamil, however  
32 specific targeting of transient or long lasting Ca<sup>2+</sup> channel subfamilies had no detrimental  
33 effect. Further investigation revealed that tetrandrine blockage of two-pore channels (TPCs),  
34 the activity of which is essential for endolysosomal-ER fusion, ablates infectivity of both  
35 MCPyV and SV40 by preventing disassembly of the capsid, which is required for the  
36 exposure of minor capsid protein nuclear signals necessary for nuclear transport. This study  
37 therefore identifies a novel target to restrict the entry of polyomaviruses.

38 **IMPORTANCE**

39 Polyomaviruses establish ubiquitous, asymptomatic infection in their host. However, in the  
40 immunocompromised these viruses can cause a range of potentially fatal diseases. Through  
41 the use of SV40 and MCPyV, two polyomaviruses with different capsid organisation, we  
42 have investigated the role of ion channels during infection. Here, we show that Ca<sup>2+</sup> channel  
43 activity is essential for both polyomaviruses and that MCPyV is also sensitive to K<sup>+</sup> channel  
44 blockage, highlighting new mechanistic requirements of ion channels during polyomavirus  
45 infection. In particular, tetrandrine blockage of endolysosomal-ER fusion is highlighted as an  
46 essential modulator of both SV40 and MCPyV. Given that the role of ion channels in disease  
47 have been well characterised, there is a large panel of clinically available therapeutics that  
48 could be repurposed to restrict persistent polyomavirus infection and may ultimately prevent  
49 polyomavirus-associated disease.

## 50 INTRODUCTION

51 Polyomaviruses (PyVs) are small double stranded DNA viruses that establish persistent  
52 infections in their hosts. Whilst infections are generally asymptomatic, PyVs can cause  
53 severe disease in the immunosuppressed. Common examples include BKPyV-associated  
54 nephropathy and haemorrhagic cystitis, and JCPyV-induced progressive multifocal  
55 leukoencephalopathy (PML) (1–3).

56 In ~80% of Merkel cell carcinoma (MCC) cases, Merkel cell PyV (MCPyV) infection, clonal  
57 integration and UV-mediated mutation of the viral genome occur prior to tumour cell  
58 expansion, with truncation of the large tumour antigen (LT) rendering MCPyV replication  
59 defective (4–7). Both MCPyV small T and truncated LT proteins are required for MCC  
60 survival and proliferation (8–10). Although the continuous infection of MCPyV is not  
61 implicated in MCC, the routes of virus entry into susceptible cells remain elusive. The  
62 capsids of all PyVs consist of 72 VP1 pentamers that form an icosahedral structure with  
63 T=7d symmetry and mediate initial surface receptor binding (11–13). Under each pentamer  
64 sits a minor capsid protein linking VP1 to the viral genome (11). The majority of PyVs,  
65 including SV40, BKPyV and JCPyV encode two minor capsid proteins (VP2 and VP3) which  
66 are incorporated into the capsid. MCPyV is however part of a small clade of PyVs that only  
67 express one minor capsid protein (VP2) (14).

68 All PyVs must deliver their genomes to the nucleus, commonly achieved by trafficking  
69 through the endosomal system (15, 16). Initial attachment varies across PyV species but  
70 typically involves sialylated glycans. SV40 interacts with MHC-1 and GM1 gangliosides in  
71 lipid rafts, whilst MCPyV interacts with sulphated glycosaminoglycans including heparan  
72 sulphate or chondroitin sulphate prior to secondary interactions with sialylated glycans to  
73 facilitate virus penetration (17–21). Following binding, JCPyV enters cells through clathrin-  
74 mediated endocytosis, whilst SV40, MCPyV and BKPyV enter via caveolar/lipid rafts (22–  
75 27). virions traffic through the endosomal system and in response to endosomal cues,  
76 including endosome acidification, initiate proteolytic rearrangements of the capsid prior to  
77 retrograde trafficking to the endoplasmic reticulum (ER) (25, 28–30). Within the ER, virions  
78 are further disassembled, exposing nuclear localisation signals (NLSs) that transport capsids  
79 to the nucleus via importins (31–37). Despite this knowledge, the endosomal cues that  
80 permit PyV trafficking remain poorly understood.

81 Emerging studies suggest that the current description of virus entry processes involving  
82 acidification alone are too simplistic and that the accumulation of other ions including K<sup>+</sup> and  
83 Ca<sup>2+</sup> influence virus trafficking (38–43). In the context of PyV infection, Ca<sup>2+</sup> ions have been  
84 shown to affect the structure and organisation of virus particles, regulating their disassembly

85 through virion swelling (40, 44–46). However, despite the evidence that cellular ion channels  
86 are targeted by a wide range of viruses to enhance specific lifecycle stages, their role during  
87 PyV entry has not been defined (40, 41, 53, 42, 43, 47–52).

88 In this study, we used two distantly related PyVs, namely SV40 and MCPyV, to determine if  
89  $K^+$  or  $Ca^{2+}$  channels are required for viral progression through the endosomal system. To  
90 achieve this, reporter-containing MCPyV pseudovirions (PsVs) that behave in a similar  
91 manner to WT viruses were used alongside native SV40 virions to specifically assess virus  
92 entry through high-throughput fluorescence-based detection systems. Herein, we show that  
93 MCPyV and SV40 are differentially sensitive to  $K^+$  channels and transient (T-type)  $Ca^{2+}$   
94 channel inhibitors. We further identify a shared requirement of SV40 and MCPyV for the  
95 activity of endosomal nicotinic acid adenine dinucleotide phosphate (NAADP)-Sensitive Two-  
96 Pore  $Ca^{2+}$  Channels (TPCs) that regulate ER-endosome membrane contact sites. These  
97 findings reveal potential therapeutic drug targets for PyVs and enhance our understanding of  
98 the virus entry processes.

## 99 RESULTS

100

### 101 Fluorescence-based detection of SV40 and MCPyV

102 A challenge in PyV studies are the limited experimental systems to assess the complete  
103 virus lifecycle. We initially established a high throughput fluorescence detection system to  
104 monitor the expression of SV40 T-antigens following virus infection using an Incucyte ZOOM  
105 instrument, in a manner comparable to previous methods described for Hepatitis C virus  
106 measurement (**Fig. 1A-B**) (54, 55). Cells infected with SV40 were fixed, then permeabilised  
107 and immunostained to detect T-antigens, prior to automated imaging and analysis to  
108 determine the number of T-antigen positive cells. The system could reproducibly quantify the  
109 number of SV40 T-antigen positive cells and as such could be used as a rapid method to  
110 assess the levels of virus infection (**Fig. 1C-D**). The study of MCPyV is more challenging due  
111 to a lack of reproducible infectious systems. We therefore applied reporter-containing PsVs  
112 that permit the assessment of MCPyV entry and genome release into the nucleus. MCPyV  
113 PsVs transduced target cells more slowly than SV40 infection, with detectable fluorescence  
114 observed between 48 to 72 hours post-transduction (hpt), consistent with previously reported  
115 timescales (**Fig. 1E-F**) (25). Using these systems, SV40 infections and MCPyV  
116 transductions could be performed in a 96- or 24-well plate format, respectively, providing a  
117 platform for high-throughput antiviral compound screening.

118 It is well established that PyVs traffic through the endo/lysosomal system where acidification  
119 initiates proteolytic rearrangements to promote virus disassembly. To validate our Incucyte-  
120 based system, we assessed virus infection in the presence of ammonium chloride (NH<sub>4</sub>Cl), a  
121 known inhibitor of endosomal acidification. Consistent with previous studies, NH<sub>4</sub>Cl  
122 treatment reduced MCPyV and SV40 infection by 87% and 54% respectively, further  
123 validating the system (**Fig. 2A & C**). However, despite knowledge that acidification is  
124 important, the endosomal progression of PyVs prior to ER translocation remain unclear. To  
125 determine whether the viruses enter late endosomes and/or lysosomes, cells were treated  
126 with 2-[(4-Bromophenyl) methylene]-N-(2, 6-dimethylphenyl)-hydrazinecarboxamide (EGA)  
127 to inhibit lysosomal clustering prior to virus infection. Treatment with EGA led to a 75% and  
128 78% decrease in MCPyV and SV40 infected cells respectively, suggesting that both viruses  
129 transverse the late endosome/lysosomal system (**Fig. 2B & D**).

### 130 K<sup>+</sup> and Ca<sup>2+</sup> channel inhibition restricts MCPyV entry

131 Ion channels have emerged as key regulators of virus entry processes. Examples include  
132 the negative sense RNA viruses, bunyamwera virus and influenza virus that require K<sup>+</sup>  
133 during endosomal transit to mediate virus priming and endosomal escape (38, 40, 56). We

134 therefore explored whether regulators of two of the major endosomal ion channel families,  
135 namely  $K^+$  or  $Ca^{2+}$  channels, were important for PyV entry. Treatment of cells with the broad  
136 spectrum  $K^+$  channel inhibitor tetraethylammonium (TEA) and broad-spectrum  $Ca^{2+}$  channel  
137 inhibitor verapamil inhibited MCPyV infection by 62% and 57%, respectively, suggesting that  
138 both channel families were important during MCPyV entry (**Fig. 3A-B**). In contrast, TEA had  
139 little to no-effect on SV40 infection (**Fig. 3C**), whereas Verapamil treatment caused a 57%  
140 loss of SV40 infection (**Fig. 3D**). This suggested a requirement for  $Ca^{2+}$  channels is  
141 conserved across both viruses.

#### 142 **Identification of the $K^+$ channels required during MCPyV entry**

143  $K^+$  channels are the most diverse class of membrane proteins expressed with the cell (57).  
144 There are four subfamilies that are ubiquitously expressed across nearly all kingdoms of life:  
145 (i) voltage-gated  $K^+$  channels ( $K_V$ ) (6 transmembrane domains (TMDs)), (ii) inwardly  
146 rectifying  $K^+$  channels ( $K_{IR}$ ) (2 TMDs), (iii) tandem pore domain  $K^+$  channels ( $K_{2P}$ ) (4 TMDs)  
147 and (iv)  $Ca^{2+}$  activated  $K^+$  channels ( $K_{Ca}$ ) (6 TMDs) (58). To identify which  $K^+$  channel  
148 subfamilies are required during MCPyV entry, we investigated the effects of KCl (to destroy  
149  $K^+$  gradients and thus  $K^+$  channel function) and 4-aminopyridine (4AP, a  $K_V$  channel blocker)  
150 on MCPyV and SV40 infection. Both KCl and 4AP inhibited MCPyV but neither affected  
151 SV40 (**Fig. 4A-B**). Furthermore, the anti-malarial drug quinine that promiscuously blocks a  
152 variety of  $K^+$  channels through an unknown mechanism had no effect on either MCPyV or  
153 SV40. These data highlighted differences in MCPyV and SV40 entry processes and  
154 suggested that MCPyV can be blocked by inhibitors of 4AP sensitive, quinidine insensitive  
155  $K_V$  channels.

#### 156 **Blockers of L-type $Ca^{2+}$ channels restrict MCPyV entry**

157 Given that  $K^+$  channel inhibition did not display a conserved effect upon MCPyV and SV40  
158 entry, the effect of verapamil was further investigated. Verapamil inhibits both Transient (T-  
159 type, low-voltage activated) and long lasting (L-type, high-voltage activated)  $Ca^{2+}$  channel  
160 family members. Therefore, a range of more specific  $Ca^{2+}$  blocking drugs were assessed for  
161 their effects on SV40 and MCPyV. Treatment with the T-type inhibitor flunarizine led to an  
162 83% inhibition of MCPyV infection, whilst nitrendipine (an L-type  $Ca^{2+}$  channel blocker) had  
163 no significant effect (**Fig. 5A-B**). Both flunarizine and nitrendipine did not affect SV40 entry  
164 suggesting that the requirement for T-type  $Ca^{2+}$  channels is limited to MCPyV (**Fig. 5C-D**).

#### 165 **Blockers of two pore $Ca^{2+}$ channels inhibit MCPyV and SV40**

166 It has previously been shown that verapamil, alongside a panel of classical L-type inhibitors  
167 could inhibit the entry of EBOV (41). Further investigation however identified that EBOV did

168 not not require L-type  $\text{Ca}^{2+}$  channel activity, with blockage of NAADP-dependent TPCs that  
169 regulate endosomal  $\text{Ca}^{2+}$  signalling, sufficient in preventing endolysosomal fusion of virus-  
170 containing vesicles with the ER. Given that PyVs traffic through the ER and verapamil  
171 showed an effect that was independent of the assessed  $\text{Ca}^{2+}$  channel inhibitors, the  
172 importance of TPCs during MCPyV and SV40 entry was investigated. Gabapentin, an L-type  
173  $\text{Ca}^{2+}$  channel inhibitor had no effect on MCPyV or SV40, which was comparable with  
174 nitrendipine treatment (**Fig. 6A & C**). However, treatment with the TPC inhibitor tetrandrine  
175 led to a striking concentration-dependent inhibition of both viruses, with near complete  
176 abolishment of fluorescent cells for MCPyV and SV40 at 5  $\mu\text{M}$  and 10  $\mu\text{M}$ , respectively (**Fig.**  
177 **6B & C**). Loss of infectivity for both viruses confirmed that NAADP  $\text{Ca}^{2+}$  channels were  
178 essential for PyV infection and may represent a conserved target to restrict a wider range of  
179 PyV infections.

### 180 **TPC inhibition prevents SV40 ER disassembly**

181 Although proteolytic rearrangements are initiated in acidifying endosomes, SV40 capsid  
182 disassembly sufficient for minor capsid protein exposure does not occur until the virion is  
183 processed in the ER (~6-8 hpi), with detection in the cytoplasm at 10 hpi (30). To confirm a  
184 role of TPCs during SV40 entry, virus supernatants were added to cells at 4°C to  
185 synchronise infection, prior to the addition of pre-warmed medium containing vehicle or  
186 inhibitor for 10 h. Cells were then fixed and immunostained for VP2/3 to detect disassembled  
187 virions in the ER and cytoplasm. We observed distinct puncta in cells treated with vehicle or  
188 gabapentin (**Fig. 7**). In contrast, cells treated with tetrandrine displayed no detectable puncta  
189 confirming that the capsid was unable to disassemble and expose the minor capsid NLSs  
190 required for transit to the nucleus. These results highlight an essential requirement for  
191 NAADP-stimulated  $\text{Ca}^{2+}$  channel activity during SV40 infection.

## 192 DISCUSSION

193 To date, studies regarding early events in the lifecycle of PyVs are limited. All studied PyVs  
194 traffic through the endo/lysosomal network during virus entry, which we confirmed for both  
195 MCPyV and SV40 using newly developed, high-throughput fluorescence-based assays  
196 (**Figs. 1-2**) (16). However, the specific routes of endosomal translocation and the host  
197 factors required during trafficking to the ER remain largely undefined. Whilst it has long been  
198 understood that the acidification of endosomes is essential for PyV entry cues, the  
199 endosomal balance of other ions and their crucial roles during the infection of a plethora of  
200 viruses is only beginning to emerge (15, 39).

201 There is a long-standing acceptance that acidification of maturing endosomes and  
202 lysosomes is due to the translocation of H<sup>+</sup>, which whilst true, only reflects one aspect of the  
203 highly dynamic ionic flux that regulates compartmental pH (59). Given that ion channels  
204 regulate a wide variety of cellular functions, there is an array of well characterised  
205 pharmaceutically available drugs that can be used to treat many diseases. The ability to  
206 identify and repurpose drugs is therefore a viable and cost effective means of restricting  
207 PyV-associated diseases.

208 The entry of Bunyaviruses and Filoviruses have been shown to require K<sup>+</sup> and Ca<sup>2+</sup>  
209 channels, respectively (38, 42). Therefore TEA and verapamil were applied during  
210 attachment and entry of MCPyV and SV40. The results indicated that MCPyV required both  
211 K<sup>+</sup> and Ca<sup>2+</sup> channel activity, whilst SV40 trafficking was solely sensitive to Ca<sup>2+</sup> channel  
212 blockage (**Fig. 3**). The use of a wider panel of K<sup>+</sup> channel inhibitors suggested that MCPyV  
213 required the activity of K<sub>v</sub> channels (**Fig. 4A**). Insensitivity to K<sup>+</sup> channel inhibitors during  
214 SV40 infection (**Fig. 4B**) highlighted mechanistic differences between MCPyV and SV40.  
215 Importantly, neither blocker inhibited SV40 so their effects cannot be mediated through  
216 modulation of endosomal pH. However, further screening with other human PyVs such as  
217 JCPyV and BKPyV may identify conserved requirements that could be targeted in the  
218 treatment of PyV-associated disease in humans.

219 Due to conserved sensitivity of MCPyV and SV40 upon challenge with verapamil, the role of  
220 Ca<sup>2+</sup> channels was further explored. Treatment with flunarizine and nitrendipine, T- and L-  
221 type Ca<sup>2+</sup> channel inhibitors, respectively, produced surprising results (**Fig. 5A-D**). Whilst  
222 MCPyV was sensitive to T-type Ca<sup>2+</sup> channel inhibition there was no observed inhibition of  
223 SV40 with either drug, again highlighting differences between MCPyV and SV40 during  
224 entry. The lack of phenotypic change for SV40 was however comparable to data relating to  
225 Ebola virus (EBOV), where verapamil was shown to prevent docking of virion-containing  
226 endosomes with the ER through inhibition of NAADP-sensitive Ca<sup>2+</sup> channels (41). EBOV



227 inhibition was further characterised to be via NAADP-sensitive TPC1/2 activity, therefore we  
228 similarly investigated whether TPC inhibition could restrict MCPyV and SV40. Treatment  
229 with the L-type  $\text{Ca}^{2+}$  channel gabapentin had no effect upon entry of MCPyV or SV40 (**Fig.**  
230 **6A&C**). However, treatment with the NAADP-sensitive  $\text{Ca}^{2+}$  channel inhibitor tetrandrine  
231 showed a concentration-dependent effect upon both viruses, with ablation of entry for  
232 MCPyV and SV40 at 5  $\mu\text{M}$  and 10  $\mu\text{M}$ , respectively (**Fig. 6B&D**). As tetrandrine-mediated  
233 inhibition of EBOV entry was due to the prevention of ER docking, a viral uncoating assay for  
234 SV40 was performed as further validation (**Fig. 7**). Consistent with previous results, following  
235 treatment with 10  $\mu\text{M}$  tetrandrine VP2/3 was undetectable, confirming that virions either did  
236 not enter the ER or were unable to disassemble to reveal VP2/3 (summarised in **Fig. 8**).  
237 Identification that PyVs share a conserved requirement with EBOV suggests that NAADP-  
238 sensitive TPC inhibition represents a therapeutic target for viruses and pathogens that traffic  
239 through the ER during entry stages. Although tetrandrine is not widely available and there  
240 are currently limited studies into the efficacy of treatment *in vivo*, the identification of  
241 endosomal-ER fusion as a requirement for a variety of pathogens provides a common target  
242 that could potentially be exploited (60, 61).

243 In conclusion, we provide the first evidence that repurposing of clinically available drugs that  
244 modulate ion channel activity are a viable method of restricting PyV infection. This study  
245 identifies that MCPyV is more sensitive to channel inhibition than SV40, with  $\text{K}_v$  and T-type  
246  $\text{Ca}^{2+}$  channel inhibition restricting entry which may be applicable to other humans PyVs.  
247 Additionally we have demonstrated that the NAADP-sensitive TPC inhibitor tetrandrine is a  
248 potent inhibitor of both MCPyV and SV40.  $\text{Ca}^{2+}$  channel modulation is therefore a potential  
249 mechanism through which human PyV diseases associated with persistent infection could  
250 be modulated. Coupled with previous studies, this requirement reveals a conserved target to  
251 restrict a wider range of pathogens that transit through the ER.

## 252 **MATERIALS AND METHODS**

253

### 254 **Antibodies and chemicals**

255 The (pAb)108 hybridoma used to detect SV40 T-antigens was a kind gift from Daniel DiMaio  
256 (Yale Cancer Centre, Connecticut, USA). SV40 VP2/3 antibodies were purchased from  
257 Abcam. Calnexin antibodies were purchased from Thermo Fisher Scientific.

258 EGA, gabapentin, KCl, quinine, TEA, tetrandrine and verapamil were purchased from  
259 Sigma-Aldrich. 4AP and flunarizine were purchased from Alfa Aesar. Nitrendipine and  
260 NH<sub>4</sub>Cl were purchased from Santa Cruz Biotech.

### 261 **Cell lines and maintenance**

262 HEK293TT cells were a kind gift from Christopher Buck (NIH, National Cancer Institute,  
263 Bethesda, MD, USA). Vero cells were a kind gift from Andrew Macdonald (University of  
264 Leeds, Leeds, UK). Cells were maintained using Dulbecco's modified Eagle's medium  
265 (DMEM) containing 10% (v/v) foetal bovine serum (FBS) and 50 U/mL penicillin and  
266 streptomycin (complete DMEM). HEK293TT medium was supplemented with 250 µg  
267 hygromycin B (Thermo Fisher Scientific) to maintain T-antigen expression, with removal prior  
268 to experimentation.

### 269 **SV40 production and titration**

270 Stock of SV40 supernatants were provided by Andrew Macdonald (University of Leeds,  
271 Leeds, UK). Virus stocks were produced through infection of naïve Vero cells, with virus  
272 progeny containing medium removed 7 days post-infection. Supernatants were centrifuged  
273 at 16,000 g to pellet cellular debris and aspirated medium flash frozen and stored at -80 °C.

274 To determine virus stocks 5x10<sup>3</sup> Vero cells were seeded into wells of a 96-well plate 18  
275 hours prior to infection. Virus stocks were diluted 5-fold prior to a 2-fold dilution series using  
276 complete DMEM. Virus dilutions were incubated on cells in triplicate for 2 hours before  
277 aspiration and addition of fresh complete DMEM. Cells were fixed 24 hpi with 4% (w/v)  
278 paraformaldehyde (Sigma-Aldrich) and permeabilised in 0.1% (v/v) Triton X-100 (Fisher  
279 Scientific). SV40 T-antigens were detected using (pAb)108 and species-specific AlexaFluor  
280 488 (Life Technologies, Thermo Fisher Scientific) antibodies. Wells were imaged using an  
281 Incucyte ZOOM instrument, with 4 non-overlapping images taken in each well. The number  
282 of T-antigen positive cells were counted per well. Reciprocals were calculated to identify  
283 dilutions with a linear relationship between dilution and T-antigen positive cells. Values were  
284 used to calculate IU/mL.

## 285 **SV40 infection assay**

286 Vero cells ( $5 \times 10^3$ /well) were seeded into 96-well plate 18 hours prior to experimentation. If  
287 applicable, cells were pre-treated with chemical inhibitors for 1 hour. SV40 virions were  
288 diluted in complete DMEM (containing chemical inhibitors if applicable) to achieve an MOI of  
289 1 relative to initial seeding and incubated on cells for 2 hours with gentle rocking every 30  
290 minutes before aspiration and addition of fresh complete DMEM. Cells were fixed 24 hpi,  
291 immunostained, imaged and analysed using an Incucyte ZOOM System as previously  
292 described. Inhibitor effects were calculated through comparison to untreated controls.  
293 Percentage confluence was calculated by Incucyte ZOOM analysis to ensure cell  
294 proliferation in drug-treated wells, with <80% confluence omitted.

## 295 **MCPyV PsV production**

296 Production of MCPyV PsVs has been previously described (14, 21, 62, 63). Briefly, 293TT  
297 cells were transfected with pwM2m, ph2m and pEGFP-C1 and harvested by trypsinisation  
298 48 hours post transfection. Cells were pelleted before lysis using 0.5% Triton X-100 and  
299 incubated for 24 hours at 37 °C following addition of 1/1000<sup>th</sup> volume RNase Cocktail  
300 enzyme mix (Ambion) and 25 mM ammonium sulphate (Sigma-Aldrich), pH 9.0. PsVs were  
301 extracted by centrifugation and loaded onto a 27-33-39% discontinuous opti-Prep (Sigma-  
302 Aldrich) gradients prior to ultracentrifugation. Fractions were collected and samples were  
303 analysed by Western blotting and silver staining to identify PsV-containing fractions, which  
304 were pooled and flash frozen prior to storage at -80 °C. BSA standards were separated by  
305 SDS-PAGE alongside gradient fractions prior to silver staining to determine relative mass of  
306 PsVs in each fraction.

## 307 **MCPyV reporter assays**

308  $5 \times 10^4$  293TT cells were seeded into wells of a poly-L-lysine treated 24-well plate 18 hours  
309 before addition of PsVs. If required, pre-treatment with chemical inhibitors was performed  
310 for 1 hour. 10 ng VP1 equivalent of PsV stock was mixed with complete DMEM (containing  
311 chemical inhibitor if required) and added to wells for 2 hours with gentle shaking every 30  
312 minutes before aspiration and addition of fresh complete DMEM. 72 hpt detection of GFP  
313 positive cells was performed using an Incucyte ZOOM System as previously  
314 described. Chemical inhibitor effects were calculated through comparison to an untreated  
315 control. Percentage confluence was calculated by Incucyte ZOOM analysis to ensure  
316 continued proliferation in comparison to untreated cells, with chemical inhibitors with <80%  
317 comparable confluence omitted.

## 318 **Minor capsid protein exposure assay**

319  $5 \times 10^4$  Vero cells were seeded onto coverslips in 24-well plates 18 hours before  
320 experimentation. Plates were chilled at 4 °C for 30 minutes before addition of SV40 virions at  
321 an MOI of 3 in pre-chilled complete DMEM (containing inhibitors if applicable). Cells were  
322 kept at 4 °C for 1 hour with gentle agitation every 15 minutes to permit virus binding. Medium  
323 was then aspirated and replaced with pre-warmed complete DMEM (containing inhibitors if  
324 applicable) to synchronise infection. Cells were fixed 10 hours post infection and  
325 immunofluorescence performed as previously described (64). VP2/3 specific antibodies were  
326 used to detect exposed minor capsid proteins, with calnexin antibodies used to visualise  
327 proximity to the ER. Microscopy was performed using a ZEISS LSM 880 confocal  
328 microscope.

329

### 330 **ACKNOWLEDGEMENTS**

331 The authors would like to thank Daniel DiMaio, Christopher Buck and Andrew Macdonald for  
332 kindly providing reagents used in this study. We are grateful to members of the Whitehouse  
333 laboratory for helpful discussions. The work was funded in parts by a MRC studentship  
334 (95505126) and Royal Society University Research Fellowship to JM (UF100419).

335 **REFERENCES**

- 336 1. Padgett BL, Zurhein GM, Walker DL, Eckroade RJ, Dessel BH. 1971. Cultivation of  
337 Papova-Like Virus From Human Brain With Progressive Multifocal  
338 Leucoencephalopathy. *Lancet* 297:1257–1260.
- 339 2. Gardner SD, Field AM, Coleman D V., Hulme B. 1971. New Human Papovavirus  
340 (B.K.) Isolated From Urine After Renal Transplantation. *Lancet*1971/06/19. 297:1253–  
341 1257.
- 342 3. Knowles WA. 2006. Discovery and epidemiology of the human polyomaviruses BK  
343 virus (BKV) and JC virus (JCV). *Adv Exp Med Biol*. Springer New York, New York,  
344 NY.
- 345 4. Feng H, Shuda M, Chang Y, Moore PS. 2008. Clonal integration of a polyomavirus in  
346 human Merkel cell carcinoma. *Science* (80- )2008/01/19. 319:1096–1100.
- 347 5. Shuda M, Feng H, Kwun HJ, Rosen ST, Gjoerup O, Moore PS, Chang Y. 2008. T  
348 antigen mutations are a human tumor-specific signature for Merkel cell polyomavirus.  
349 *Proc Natl Acad Sci U S A*2008/09/25. 105:16272–16277.
- 350 6. Schrama D, Sarosi EM, Adam C, Ritter C, Kaemmerer U, Klopocki E, König EM,  
351 Utikal J, Becker JC, Houben R. 2019. Characterization of six Merkel cell  
352 polyomavirus-positive Merkel cell carcinoma cell lines: Integration pattern suggest that  
353 large T antigen truncating events occur before or during integration. *Int J Cancer*  
354 145:1020–1032.
- 355 7. Nwogu N, Boyne JR, Dobson SJ, Poterlowicz K, Blair GE, Macdonald A, Mankouri J,  
356 Whitehouse A. 2018. Cellular sheddases are induced by Merkel cell polyomavirus  
357 small tumour antigen to mediate cell dissociation and invasiveness. *PLoS Pathog*  
358 14:e1007276.
- 359 8. Houben R, Shuda M, Weinkam R, Schrama D, Feng H, Chang Y, Moore PS, Becker  
360 JC. 2010. Merkel Cell Polyomavirus-Infected Merkel Cell Carcinoma Cells Require  
361 Expression of Viral T Antigens. *J Virol*2010/05/07. 84:7064–7072.
- 362 9. Shuda M, Kwun HJ, Feng H, Chang Y, Moore PS. 2011. Human Merkel cell  
363 polyomavirus small T antigen is an oncoprotein targeting the 4E-BP1 translation  
364 regulator. *J Clin Invest*2011/08/16. 121:3623–3634.
- 365 10. Richards KF, Guastafierro A, Shuda M, Toptan T, Moore PS, Chang Y. 2015. Merkel  
366 cell polyomavirus T antigens promote cell proliferation and inflammatory cytokine

- 367 gene expression. *J Gen Virol* 2015/09/20. 96:3532–3544.
- 368 11. Hurdiss DL, Morgan EL, Thompson RF, Prescott EL, Panou MM, Macdonald A,  
369 Ranson NA. 2016. New Structural Insights into the Genome and Minor Capsid  
370 Proteins of BK Polyomavirus using Cryo-Electron Microscopy. *Structure* 2016/03/22.  
371 24:528–536.
- 372 12. Neu U, Maginnis MS, Palma AS, Ströh LJ, Nelson CDS, Feizi T, Atwood WJ, Stehle  
373 T. 2010. Structure-function analysis of the human JC polyomavirus establishes the  
374 LSTc pentasaccharide as a functional receptor motif. *Cell Host Microbe* 8:309–319.
- 375 13. Moens U, Calvignac-Spencer S, Lauber C, Ramqvist T, Feltkamp MCW, Daugherty  
376 MD, Verschoor EJ, Ehlers B. 2017. ICTV virus taxonomy profile: Polyomaviridae. *J*  
377 *Gen Virol* 2017/06/24. 98:1159–1160.
- 378 14. Schowalter RM, Buck CB. 2013. The Merkel Cell Polyomavirus Minor Capsid Protein.  
379 *PLoS Pathog* 2013/08/31. 9:e1003558.
- 380 15. Qian M, Cai D, Verhey KJ, Tsai B. 2009. A lipid receptor sorts polyomavirus from the  
381 endolysosome to the endoplasmic reticulum to cause infection. *PLoS Pathog*  
382 5:e1000465.
- 383 16. Tsai B, Qian M. 2010. Cellular entry of polyomaviruses. *Curr Top Microbiol Immunol*  
384 343:177–194.
- 385 17. Miller-Podraza H, Bradley RM, Fishman PH. 1982. Biosynthesis and Localization of  
386 Gangliosides in Cultured Cells. *Biochemistry* 21:3260–3265.
- 387 18. Clayson ET, Brando L V, Compans RW. 1989. Release of simian virus 40 virions from  
388 epithelial cells is polarized and occurs without cell lysis. *J Virol* 1989/05/01. 63:2278–  
389 88.
- 390 19. Stang E, Kartenbeck J, Parton RG. 1997. Major histocompatibility complex class I  
391 molecules mediate association of SV40 with caveolae. *Mol Biol Cell* 8:47–57.
- 392 20. Anderson HA, Chen Y, Norkin LC. 1998. MHC class I molecules are enriched in  
393 caveolae but do not enter with simian virus 40. *J Gen Virol* 79:1469–1477.
- 394 21. Schowalter RM, Pastrana D V., Buck CB. 2011. Glycosaminoglycans and sialylated  
395 glycans sequentially facilitate merkel cell polyomavirus infectious entry. *PLoS*  
396 *Pathog* 2011/08/11. 7:e1002161.
- 397 22. Gilbert JM, Benjamin TL. 2000. Early Steps of Polyomavirus Entry into Cells. *J Virol*  
398 74:8582–8588.

- 399 23. Eash S, Querbes W, Atwood WJ. 2004. Infection of Vero Cells by BK Virus Is  
400 Dependent on Caveolae. *J Virol* 2004/10/14. 78:11583–11590.
- 401 24. Moriyama T, Marquez JP, Wakatsuki T, Sorokin A. 2007. Caveolar Endocytosis Is  
402 Critical for BK Virus Infection of Human Renal Proximal Tubular Epithelial Cells. *J*  
403 *Virol* 81:8552–8562.
- 404 25. Becker M, Dominguez M, Greune L, Soria-Martinez L, Pfeleiderer MM, Schowalter R,  
405 Buck CB, Blaum BS, Schmidt MA, Schelhaas M. 2019. Infectious Entry of Merkel Cell  
406 Polyomavirus. *J Virol* 93:JVI.02004-18.
- 407 26. Pho MT, Ashok A, Atwood WJ. 2000. JC Virus Enters Human Glial Cells by Clathrin-  
408 Dependent Receptor-Mediated Endocytosis. *J Virol* 74:2288–2292.
- 409 27. Mayberry CL, Soucy AN, Lajoie CR, DuShane JK, Maginnis MS. 2019. JC  
410 Polyomavirus Entry by Clathrin-Mediated Endocytosis Is Driven by  $\beta$ -Arrestin. *J Virol*  
411 93:JVI.01948-18.
- 412 28. Engel S, Heger T, Mancini R, Herzog F, Kartenbeck J, Hayer A, Helenius A. 2011.  
413 Role of Endosomes in Simian Virus 40 Entry and Infection. *J Virol* 85:4198–4211.
- 414 29. Mercer J, Schelhaas M, Helenius A. 2010. Virus Entry by Endocytosis. *Annu Rev*  
415 *Biochem* 79:803–833.
- 416 30. Kuksin D, Norkin LC. 2012. Disassembly of Simian Virus 40 during Passage through  
417 the Endoplasmic Reticulum and in the Cytoplasm. *J Virol* 86:1555–1562.
- 418 31. Schelhaas M, Malmström J, Pelkmans L, Haugstetter J, Ellgaard L, Grünewald K,  
419 Helenius A. 2007. Simian Virus 40 Depends on ER Protein Folding and Quality  
420 Control Factors for Entry into Host Cells. *Cell* 131:516–529.
- 421 32. Nishikawa SI, Fewell SW, Kato Y, Brodsky JL, Endo T. 2001. Molecular chaperones  
422 in the yeast endoplasmic reticulum maintain the solubility of proteins for  
423 retrotranslocation and degradation. *J Cell Biol* 153:1061–1069.
- 424 33. Geiger R, Andrichke D, Friebe S, Herzog F, Luisoni S, Heger T, Helenius A. 2011.  
425 BAP31 and BiP are essential for dislocation of SV40 from the endoplasmic reticulum  
426 to the cytosol. *Nat Cell Biol* 13:1305–1314.
- 427 34. Yamada M, Kasamatsu H. 1993. Role of nuclear pore complex in simian virus 40  
428 nuclear targeting. *J Virol* 67:119–30.
- 429 35. Nakanishi A, Shum D, Morioka H, Otsuka E, Kasamatsu H. 2002. Interaction of the  
430 Vp3 Nuclear Localization Signal with the Importin  $\alpha$  Heterodimer Directs Nuclear

- 431 Entry of Infecting Simian Virus 40. *J Virol* 76:9368–9377.
- 432 36. Nakanishi A, Li PP, Qu Q, Jafri QH, Kasamatsu H. 2007. Molecular dissection of  
433 nuclear entry-competent SV40 during infection. *Virus Res* 124:226–230.
- 434 37. Pelkmans L, Kartenbeck J, Helenius A. 2001. Caveolar endocytosis of simian virus 40  
435 reveals a new two-step vesicular-transport pathway to the ER. *Nat Cell Biol* 3:473–  
436 483.
- 437 38. Hover S, King B, Hall B, Loundras EA, Taqi H, Daly J, Dallas M, Peers C, Schnettler  
438 E, Mckimmie C, Kohl A, Barr JN, Mankouri J. 2016. Modulation of potassium channels  
439 inhibits bunyavirus infection. *J Biol Chem* 291:3411–3422.
- 440 39. Hover S, Foster B, Barr JN, Mankouri J. 2017. Viral dependence on cellular ion  
441 channels – an emerging antiviral target? *J Gen Virol* 98:345–351.
- 442 40. Hover S, Foster B, Fontana J, Kohl A, Goldstein SAN, Barr JN, Mankouri J. 2018.  
443 Bunyavirus requirement for endosomal K<sup>+</sup> reveals new roles of cellular ion channels  
444 during infection. *PLoS Pathog* 14:e1006845.
- 445 41. Sakurai Y, Kolokoltsov AA, Chen CC, Tidwell MW, Bauta WE, Klugbauer N, Grimm C,  
446 Wahl-Schott C, Biel M, Davey RA. 2015. Two-pore channels control Ebola virus host  
447 cell entry and are drug targets for disease treatment. *Science* (80- ) 347:995–998.
- 448 42. Gehring G, Rohrmann K, Atenchong N, Mittler E, Becker S, Dahlmann F, Pöhlmann  
449 S, Vondran FWR, David S, Manns MP, Ciesek S, von Hahn T. 2014. The clinically  
450 approved drugs amiodarone, dronedarone and verapamil inhibit filovirus cell entry. *J*  
451 *Antimicrob Chemother* 69:2123–2131.
- 452 43. Dubey RC, Mishra N, Gaur R. 2019. G protein-coupled and ATP-sensitive inwardly  
453 rectifying potassium ion channels are essential for HIV entry. *Sci Rep* 9:4113.
- 454 44. Li PP, Nakanishi A, Tran MA, Ishizu K-I, Kawano M, Phillips M, Handa H, Liddington  
455 RC, Kasamatsu H. 2003. Importance of Vp1 Calcium-Binding Residues in Assembly,  
456 Cell Entry, and Nuclear Entry of Simian Virus 40. *J Virol* 77:7527–7538.
- 457 45. Asor R, Khaykelson D, Ben-Nun-Shaul O, Oppenheim A, Raviv U. 2019. Effect of  
458 Calcium Ions and Disulfide Bonds on Swelling of Virus Particles. *ACS Omega* 4:58–  
459 64.
- 460 46. Ishizu K-I, Watanabe H, Han S-I, Kanesashi S-N, Hoque M, Yajima H, Kataoka K,  
461 Handa H. 2001. Roles of Disulfide Linkage and Calcium Ion-Mediated Interactions in  
462 Assembly and Disassembly of Virus-Like Particles Composed of Simian Virus 40 VP1



- 463 Capsid Protein. *J Virol* 75:61–72.
- 464 47. Igloi Z, Mohl B-P, Lippiat JD, Harris M, Mankouri J. 2015. Requirement for Chloride  
465 Channel Function during the Hepatitis C Virus Life Cycle. *J Virol* 89:4023–4029.
- 466 48. Mankouri J, Dallas ML, Hughes ME, Griffin SDC, Macdonald A, Peers C, Harris M.  
467 2009. Suppression of a pro-apoptotic K<sup>+</sup> channel as a mechanism for hepatitis C virus  
468 persistence. *Proceedings of the National Academy of Sciences of the United States of*  
469 *America*.
- 470 49. Stakaityte G, Nwogu N, Lippiat JD, Blair GE, Poterlowicz K, Boyne JR, MacDonald A,  
471 Mankouri J, Whitehouse A. 2018. The cellular chloride channels CLIC1 and CLIC4  
472 contribute to virus-mediated cell motility. *J Biol Chem* 293:4582–4590.
- 473 50. Evans GL, Caller LG, Foster V, Crump CM. 2015. Anion homeostasis is important for  
474 non-lytic release of BK polyomavirus from infected cells. *Open Biol* 5:150041.
- 475 51. Choi B, Fermin CD, Comardelle AM, Haislip AM, Voss TG, Garry RF. 2008.  
476 Alterations in intracellular potassium concentration by HIV-1 and SIV Nef. *Virology* 379:103–111.
- 477 52. Herrmann M, Ruprecht K, Sauter M, Martinez J, van Heteren P, Glas M, Best B,  
478 Meyerhans A, Roemer K, Mueller-Lantzsch N. 2010. Interaction of human  
479 immunodeficiency virus gp120 with the voltage-gated potassium channel BEC1.  
480 *FEBS Lett* 584:3513–3518.
- 481 53. Zheng K, Chen M, Xiang Y, Ma K, Jin F, Wang X, Wang X, Wang S, Wang Y. 2014.  
482 Inhibition of herpes simplex virus type 1 entry by chloride channel inhibitors tamoxifen  
483 and NPPB. *Biochem Biophys Res Commun* 446:990–996.
- 484 54. Stewart H, Bartlett C, Ross-Thriepland D, Shaw J, Griffin S, Harris M. 2015. A novel  
485 method for the measurement of hepatitis C virus infectious titres using the InCuCyte  
486 ZOOM and its application to antiviral screening. *J Virol Methods* 218:59–65.
- 487 55. Charlton FW, Hover S, Fuller J, Hewson R, Fontana J, Barr JN, Mankouri J. 2019.  
488 Cellular cholesterol abundance regulates potassium accumulation within endosomes  
489 and is an important determinant in bunyavirus entry. *J Biol Chem* 294:7335–7347.
- 490 56. Stauffer S, Feng Y, Nebioglu F, Heilig R, Picotti P, Helenius A. 2014. Stepwise  
491 Priming by Acidic pH and a High K<sup>+</sup> Concentration Is Required for Efficient Uncoating  
492 of Influenza A Virus Cores after Penetration. *J Virol* 88:13029–13046.
- 493 57. Grizel A V., Glukhov GS, Sokolova OS. 2014. Mechanisms of activation of voltage-  
494 gated potassium channels. *Acta Naturae*.

- 495 58. Salkoff L. 2006. Potassium channels in *C. elegans*. WormBook.
- 496 59. Scott CC, Gruenberg J. 2011. Ion flux and the function of endosomes and lysosomes:  
497 PH is just the start: The flux of ions across endosomal membranes influences  
498 endosome function not only through regulation of the luminal pH. *BioEssays* 33:103–  
499 110.
- 500 60. Bhagya N, Chandrashekar KR. 2016. Tetrandrine - A molecule of wide bioactivity.  
501 *Phytochemistry*. Pergamon.
- 502 61. Bhagya N, Chandrashekar KR. 2018. Tetrandrine and cancer – An overview on the  
503 molecular approach. *Biomed Pharmacother*. Elsevier Masson.
- 504 62. Buck CB, Thompson CD. 2007. Production of Papillomavirus-Based Gene Transfer  
505 Vectors. *Curr Protoc Cell Biol* 37:26.1.1-26.1.19.
- 506 63. Pastrana D V., Tolstov YL, Becker JC, Moore PS, Chang Y, Buck CB. 2009.  
507 Quantitation of human seroresponsiveness to Merkel cell polyomavirus. *PLoS*  
508 *Pathog*2009/09/15. 5:e1000578.
- 509 64. Schumann S, Jackson BR, Yule I, Whitehead SK, Reville C, Foster R, Whitehouse A.  
510 2016. Targeting the ATP-dependent formation of herpesvirus ribonucleoprotein  
511 particle assembly as an antiviral approach. *Nat Microbiol* 2:16201.

512 **Figure legends**

513 **Figure 1: Development of immunofluorescence-based systems to determine SV40 titre**  
514 **and study early events in the lifecycles of SV40 and MCPyV.**

515 Visualisation of SV40 infected Vero cells 24 hours post infection by light microscopy (**A**) and  
516 Incucyte ZOOM instrument (**B**). For light microscopy DAPI was used to stain nucleic acids  
517 whilst SV40 LT/ST specific primary and Alexa Fluor 488 secondary antibodies were used to  
518 visualise infected cells. Images were taken using an EVOS II microscope. For validation by  
519 Incucyte detection, SV40 infected Vero cells were similarly immunostained before imaging.  
520 Shown are representative images using differentially diluted virus stock, scale bar 300  $\mu$ M.  
521 (**C**) SV40 T-antigen positive cell counts were determined by Incucyte ZOOM detection at a  
522 range of dilutions. Reversal of dilution factors was performed to determine infectious  
523 units/mL (**D**), whereby the plateau represented viral titre (green) and hypervariable replicates  
524 were indicative of loss of assay sensitivity (red). (**E**) Viability of Incucyte detection for GFP-  
525 expressing MCPyV PsVs was also confirmed by imaging at 24-, 48- and 72-hours post  
526 transduction, with autonomous quantification of GFP-positive cells (**F**). Scale bar 300  $\mu$ M.

527

528 **Figure 2: MCPyV and SV40 both enter into acidified endosomes.**

529 (**A+B**) 293TT cells were incubated with drug as described for 1 hour before addition of 10 ng  
530 VP1-equivalent MCPyV GFP PsVs for 2 hours with occasional agitation. PsV containing  
531 medium was removed and replaced with fresh drug-containing medium, with Incucyte  
532 detection 72 hours post transduction to determine the number of GFP-positive cells. (**C+D**)  
533 Vero cells were incubated with drug as described for 1 hour before addition of SV40 virions  
534 at an MOI of 1 for 2 hours with occasional agitation. Fresh drug-containing medium was then  
535 added for an incubation of 24 hours before fixation and permeabilisation. SV40 T-antigens  
536 were immunostained using an SV40 LT/ST antibody and species-specific Alexa Fluor 488  
537 secondary antibody. Wells were then imaged using an Incucyte ZOOM instrument to  
538 determine the number of T-antigen positive cells.

539

540 **Figure 3: MCPyV and SV40 have a conserved requirement of Ca<sup>2+</sup> channels, whilst K<sup>+</sup>**  
541 **channel requirements are only required by MCPyV.**

542 (**A+B**) 293TT cells were incubated with drug as described for 1 hour before addition of 10 ng  
543 VP1-equivalent MCPyV GFP PsVs for 2 hours with occasional agitation. PsV containing  
544 medium was removed and replaced with fresh drug-containing medium, with Incucyte

545 detection 72-hours post transduction to determine the number of GFP-positive cells. **(C+D)**  
546 Vero cells were incubated with drug as described for 1 hour before addition of SV40 virions  
547 at an MOI of 1 for 2 hours with occasional agitation. Fresh drug-containing medium was then  
548 added for an incubation of 24 hours before fixation and permeabilisation. SV40 T-antigens  
549 were immunostained using an SV40 LT/ST antibody and species-specific Alexa Fluor 488  
550 secondary antibody. Wells were then imaged using an Incucyte ZOOM instrument to  
551 determine the number of T-antigen positive cells.

552

553 **Figure 4: Requirement of K<sup>+</sup> channel activity during entry is MCPyV specific.**

554 **(A)** 293TT cells were incubated with drug as described for 1 hour before addition of 10 ng  
555 VP1-equivalent MCPyV GFP PsVs for 2 hours with occasional agitation. PsV containing  
556 medium was removed and replaced with fresh drug-containing medium, with Incucyte  
557 detection 72 hours post transduction to determine the number of GFP-positive cells. **(B)**  
558 Vero cells were incubated with drug as described for 1 hour before addition of SV40 virions  
559 at an MOI of 1 for 2 hours with occasional agitation. Fresh drug-containing medium was then  
560 added for an incubation of 24 hours before fixation and permeabilisation. SV40 T-antigens  
561 were immunostained using an SV40 LT/ST antibody and species-specific Alexa Fluor 488  
562 secondary antibody. Wells were then imaged using an Incucyte ZOOM instrument to  
563 determine the number of T-antigen positive cells. 50 mM KCl was omitted due to Vero cell  
564 cytotoxicity.

565

566 **Figure 5: Inhibition of T-type Ca<sup>2+</sup> channels restricts MCPyV entry, but SV40 is not**  
567 **affected by inhibition of T- or L-type Ca<sup>2+</sup> channels.**

568 **(A+B)** 293TT cells were incubated with drug as described for 1 hour before addition of 10 ng  
569 VP1-equivalent MCPyV GFP PsVs for 2 hours with occasional agitation. PsV containing  
570 medium was removed and replaced with fresh drug-containing medium, with Incucyte  
571 detection 72 hours post transduction to determine the number of GFP-positive cells. **(C+D)**  
572 Vero cells were incubated with drug as described for 1 hour before addition of SV40 virions  
573 at an MOI of 1 for 2 hours with occasional agitation. Fresh drug-containing medium was then  
574 added for an incubation of 24 hours before fixation and permeabilisation. SV40 T-antigens  
575 were immunostained using an SV40 LT/ST antibody and species-specific Alexa Fluor 488  
576 secondary antibody. Wells were then imaged using an Incucyte ZOOM instrument to  
577 determine the number of T-antigen positive cells.

578

579 **Figure 6: Two pore channel activity is essential for MCPyV and SV40 entry.**

580 **(A+B)** 293TT cells were incubated with drug as described for 1 hour before addition of 10 ng  
581 VP1-equivalent MCPyV GFP PsVs for 2 hours with occasional agitation. PsV containing  
582 medium was removed and replaced with fresh drug-containing medium, with Incucyte  
583 detection 72 hours post transduction to determine the number of GFP-positive cells. **(C+D)**  
584 Vero cells were incubated with drug as described for 1 hour before addition of SV40 virions  
585 at an MOI of 1 for 2 hours with occasional agitation. Fresh drug-containing medium was then  
586 added for an incubation of 24 hours before fixation and permeabilisation. SV40 T-antigens  
587 were immunostained using an SV40 LT/ST antibody and species-specific Alexa Fluor 488  
588 secondary antibody. Wells were then imaged using an Incucyte ZOOM instrument to  
589 determine the number of T-antigen positive cells.

590

591 **Figure 7: Two pore channel inhibition prevents SV40 disassembly and exposure of**  
592 **minor capsid proteins.**

593 Vero cells were chilled at 4 °C for 1 hour before addition of SV40 virions at an MOI of 3 in  
594 chilled growth medium. Cells were maintained at 4 °C for 1 hour with occasional agitation to  
595 facilitate binding. Pre-warmed growth medium containing drug was then added before  
596 incubation at 37 °C for 10 hours before fixation. Following permeabilisation, immunostaining  
597 was performed to detect SV40 VP2/3 and the ER using calnexin. DAPI was used to visualise  
598 nucleic acids.

599

600 **Figure 8: Schematic representation of proposed ion channel requirements during**  
601 **MCPyV and SV40 entry.**

602 Following internalisation, MCPyV and SV40 require an acidic environment. In addition to  
603 lowered pH, MCPyV also requires the activity of K<sup>+</sup> and T-type Ca<sup>2+</sup> channels whilst  
604 trafficking to the ER **(A)**. Fusion to the ER of both MCPyV and SV40 is dependent upon  
605 NAADP-sensitive Ca<sup>2+</sup> channel activity where the capsid disassembles, exposing the minor  
606 capsid proteins VP2/3 prior to translocation into the cytoplasm, which is inhibited by  
607 verapamil and tetrandrine.

Figure 1

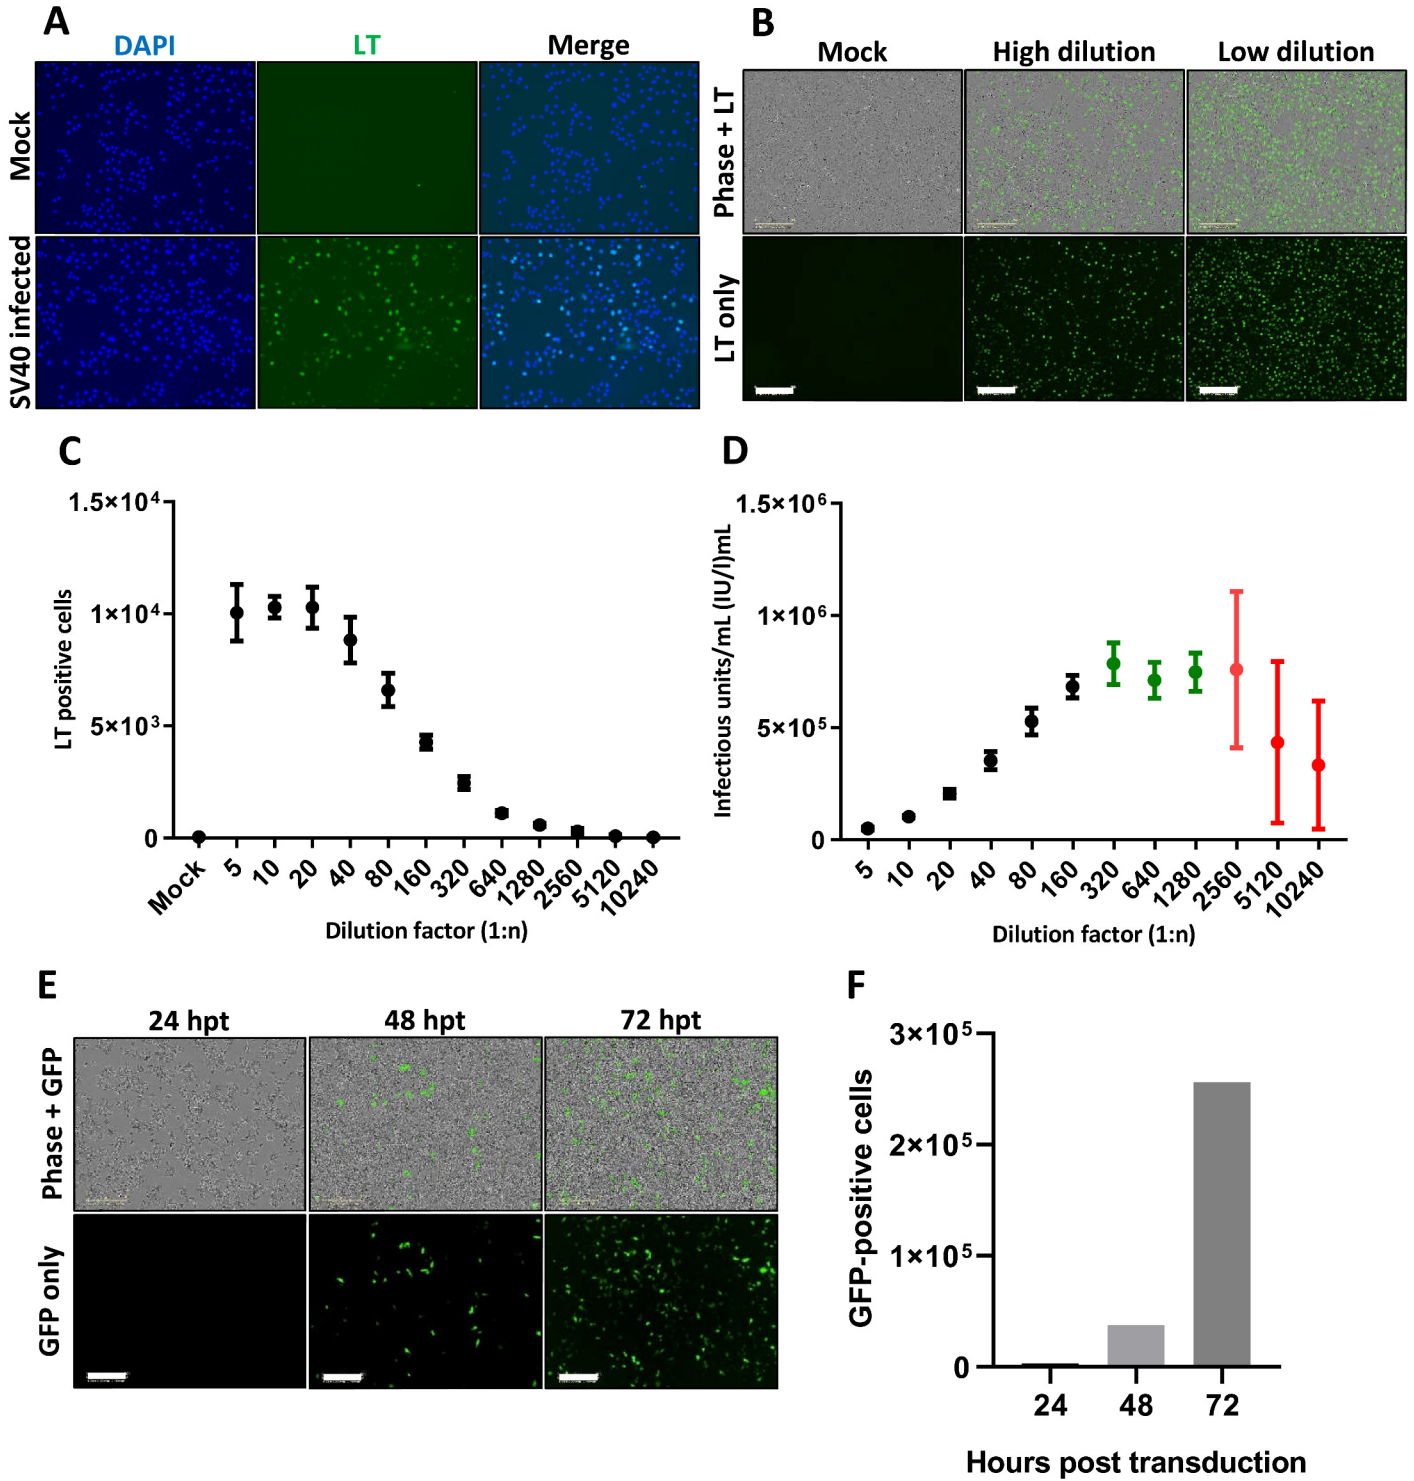

Figure 2

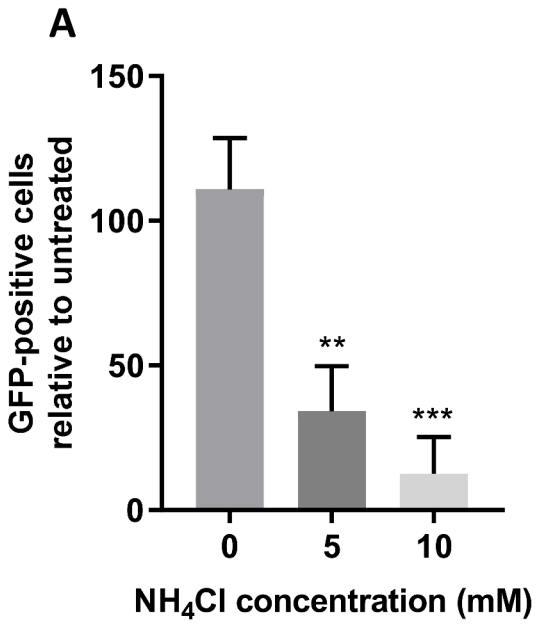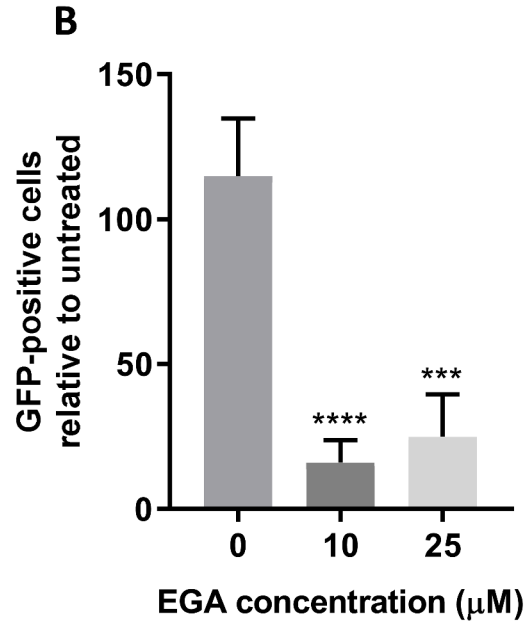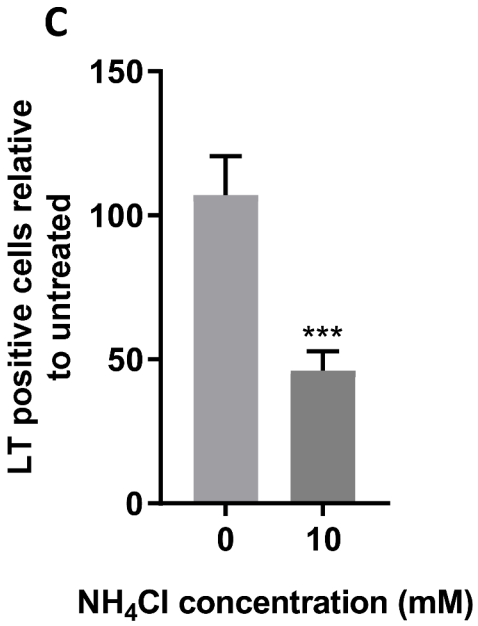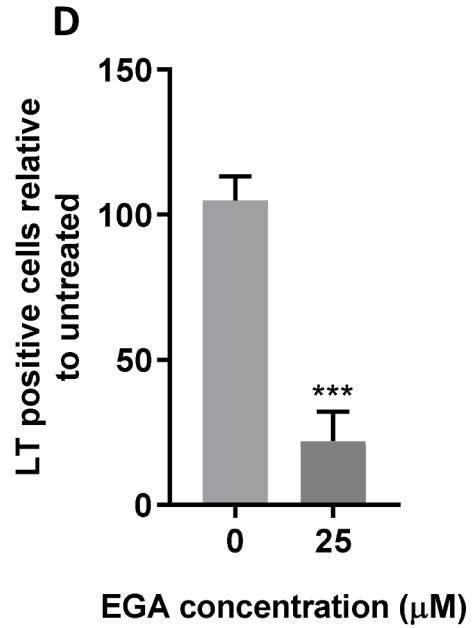

Figure 3

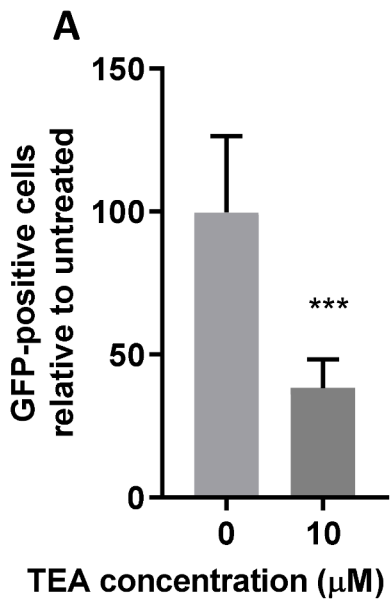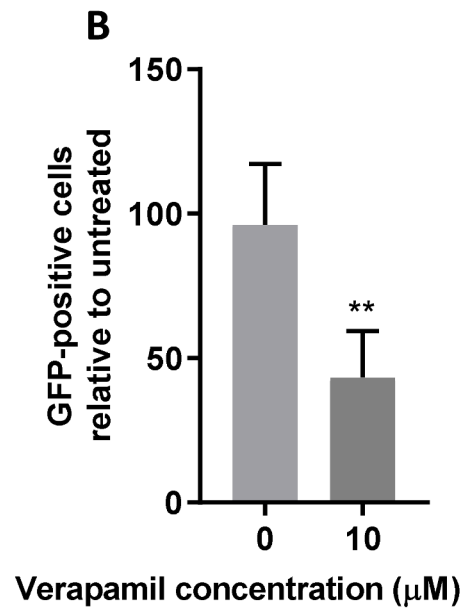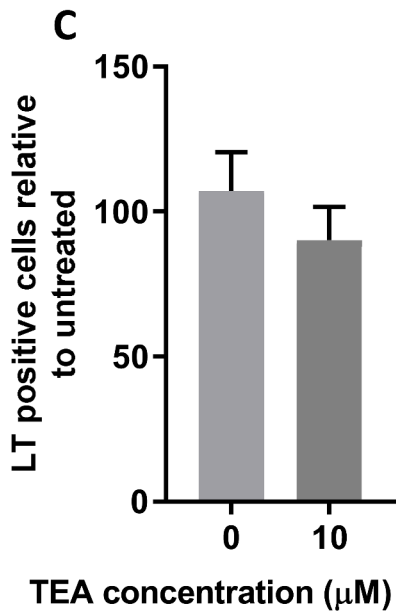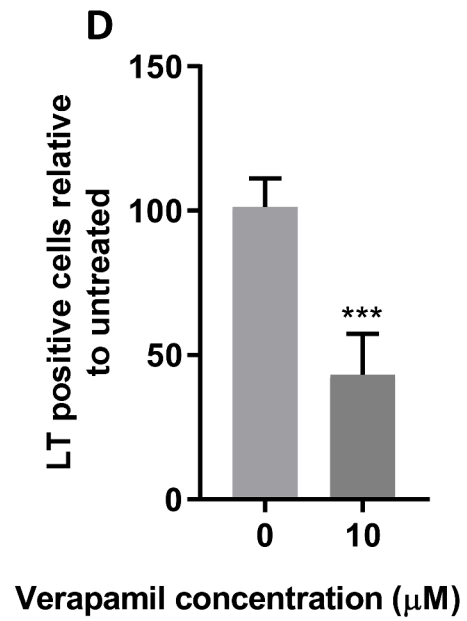



Figure 4

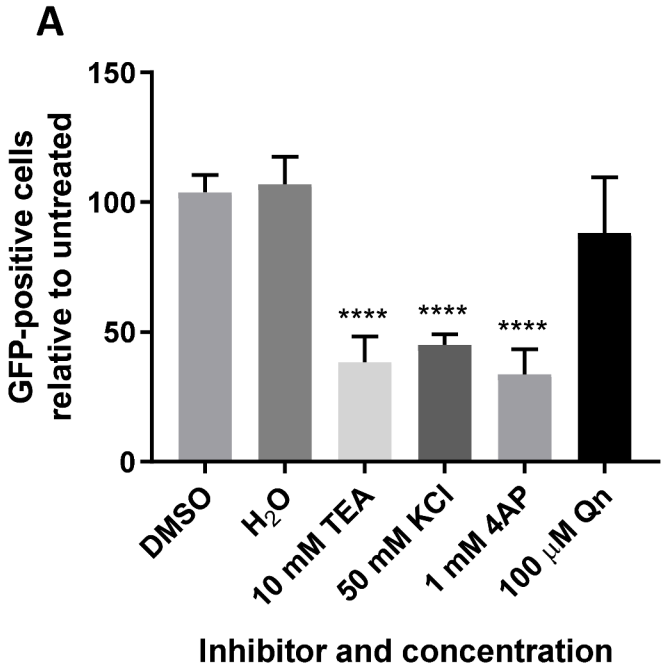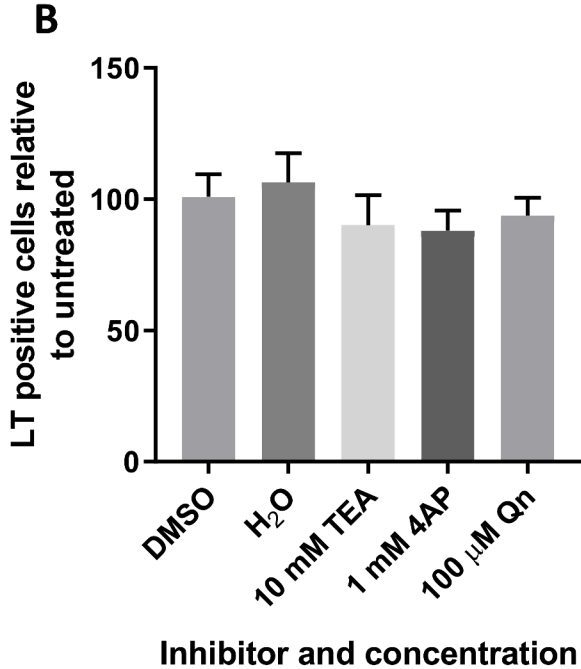

Figure 5

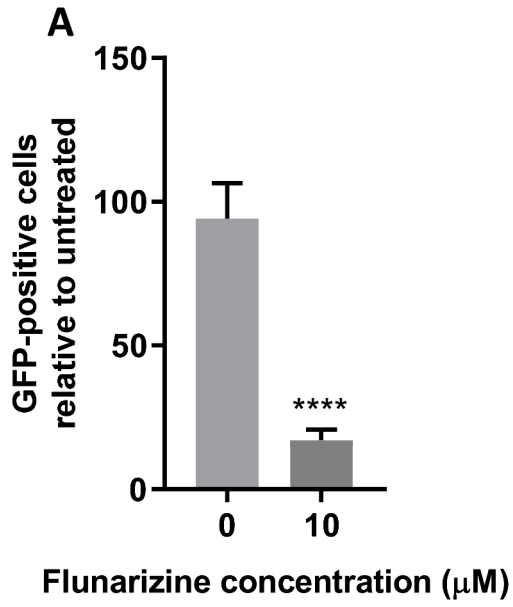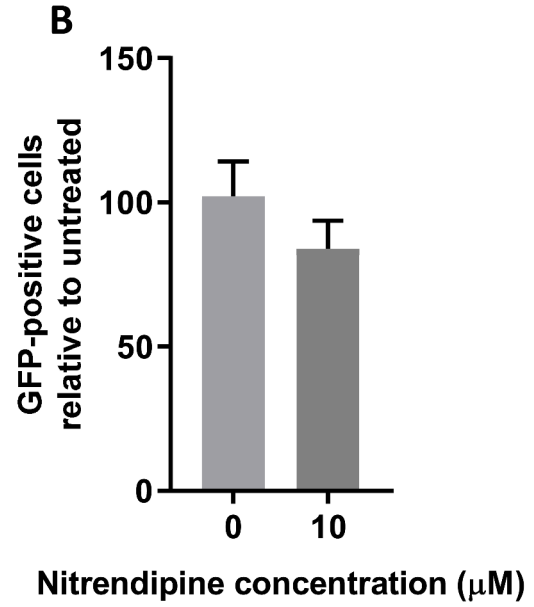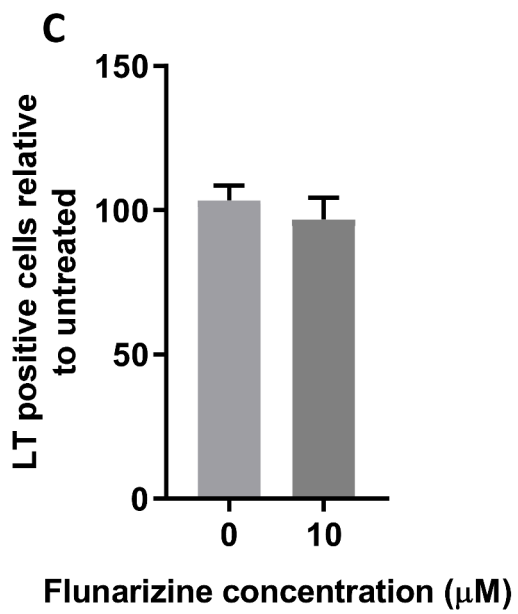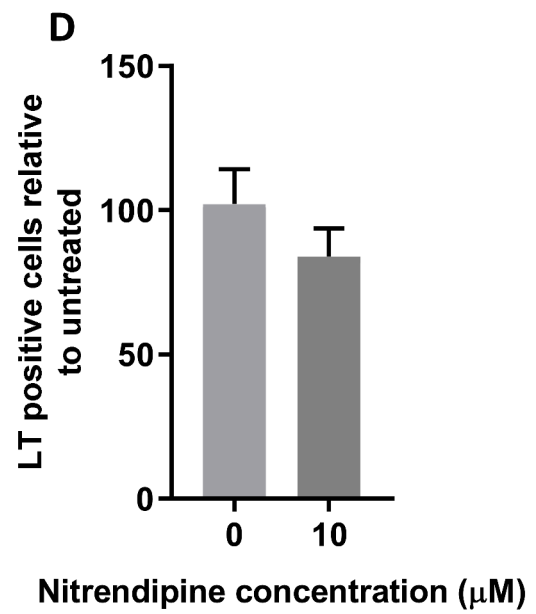

Figure 6

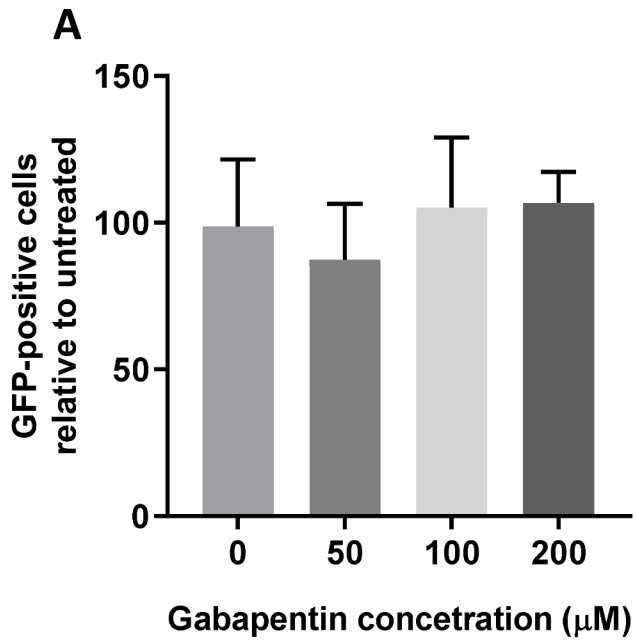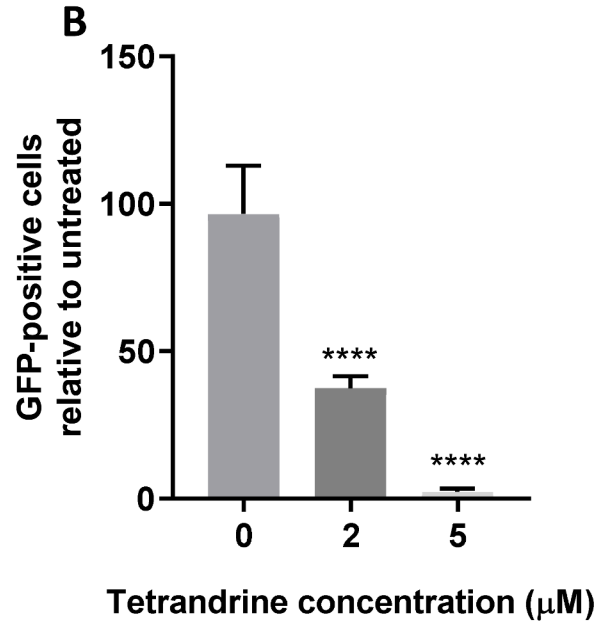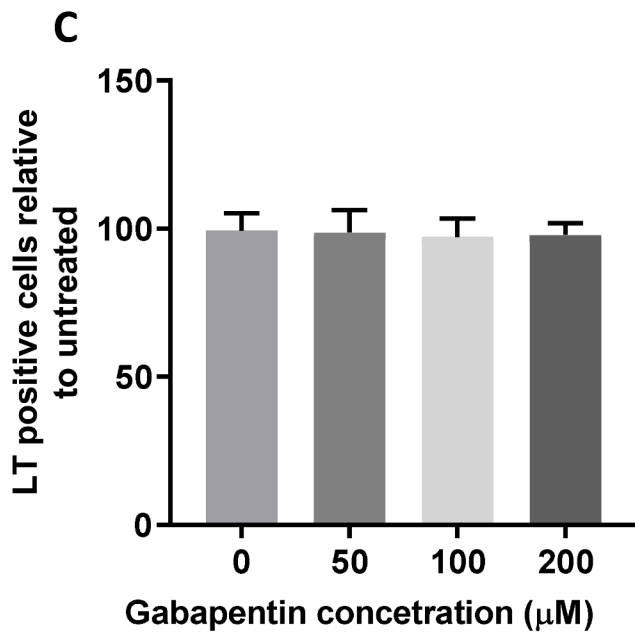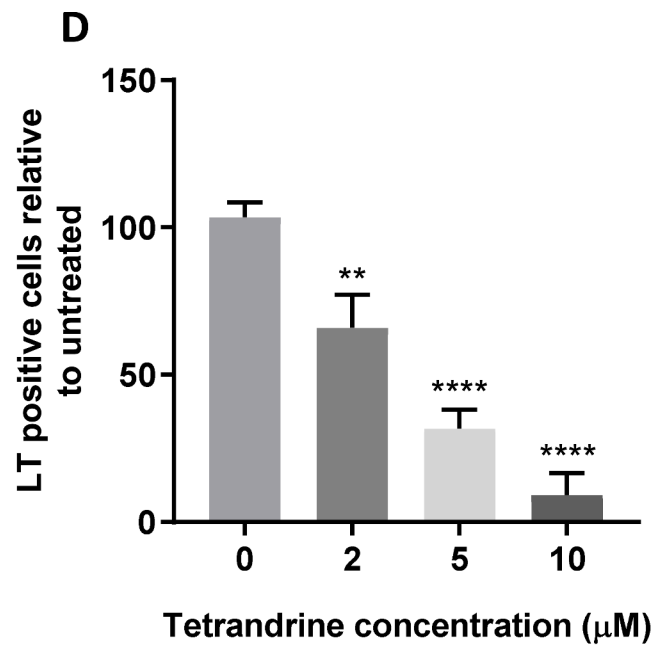

Figure 7

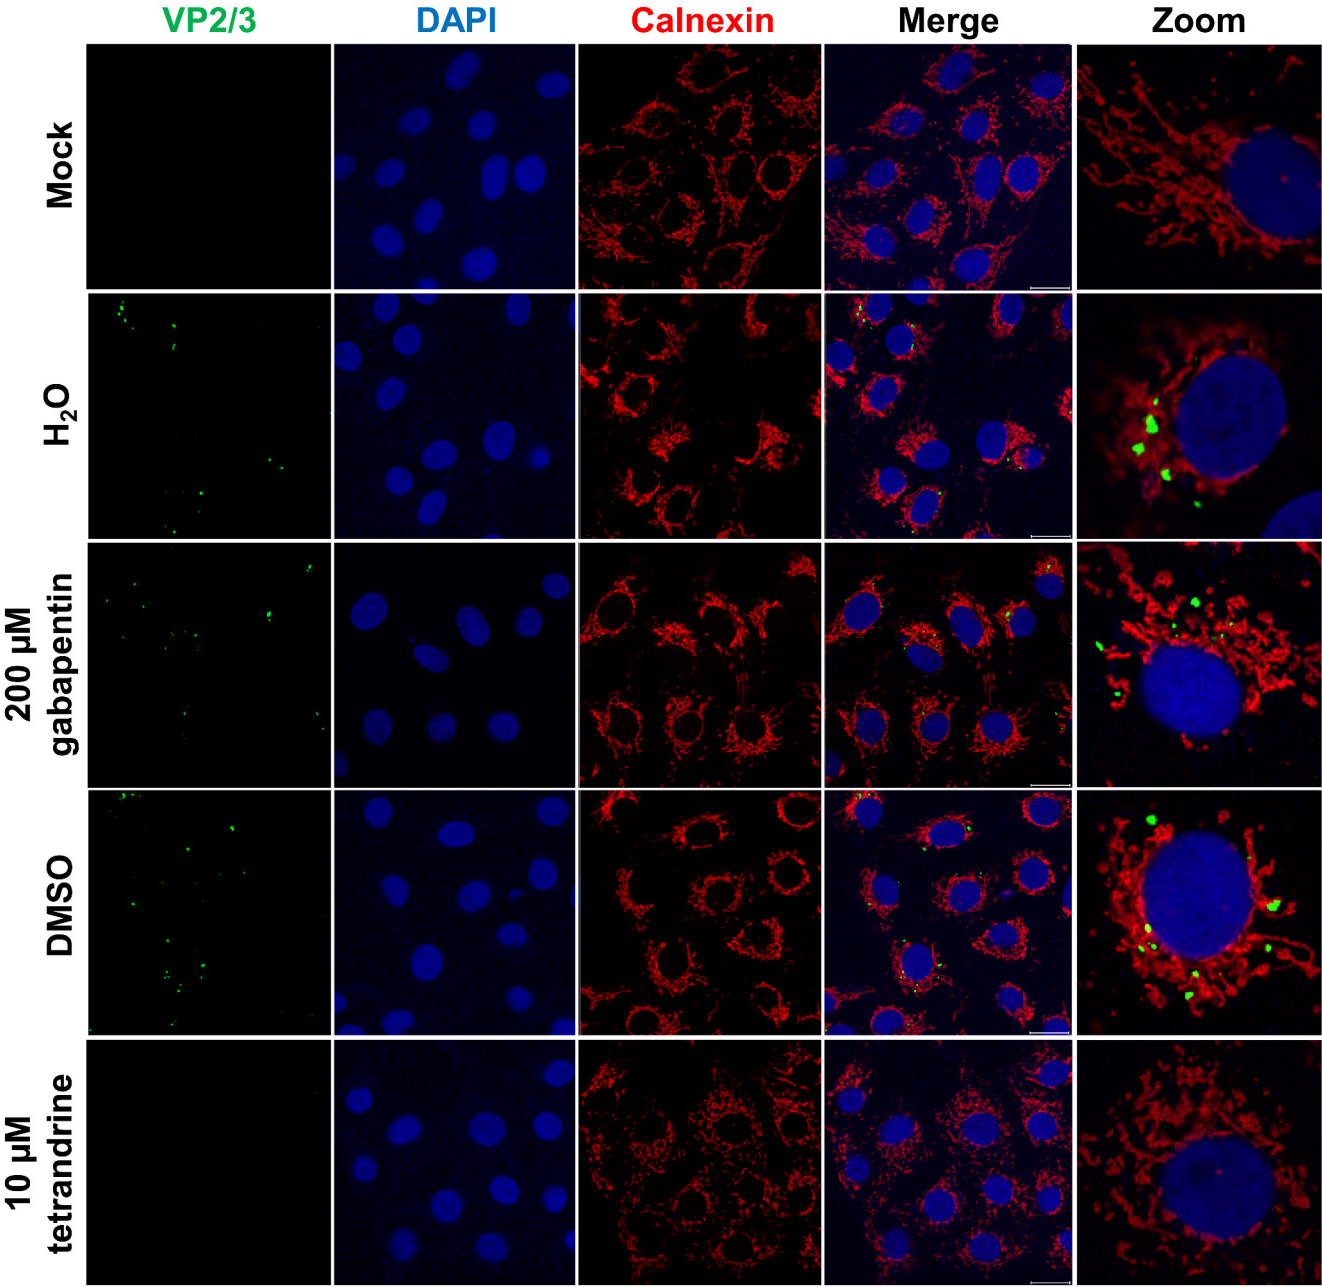

Figure 8

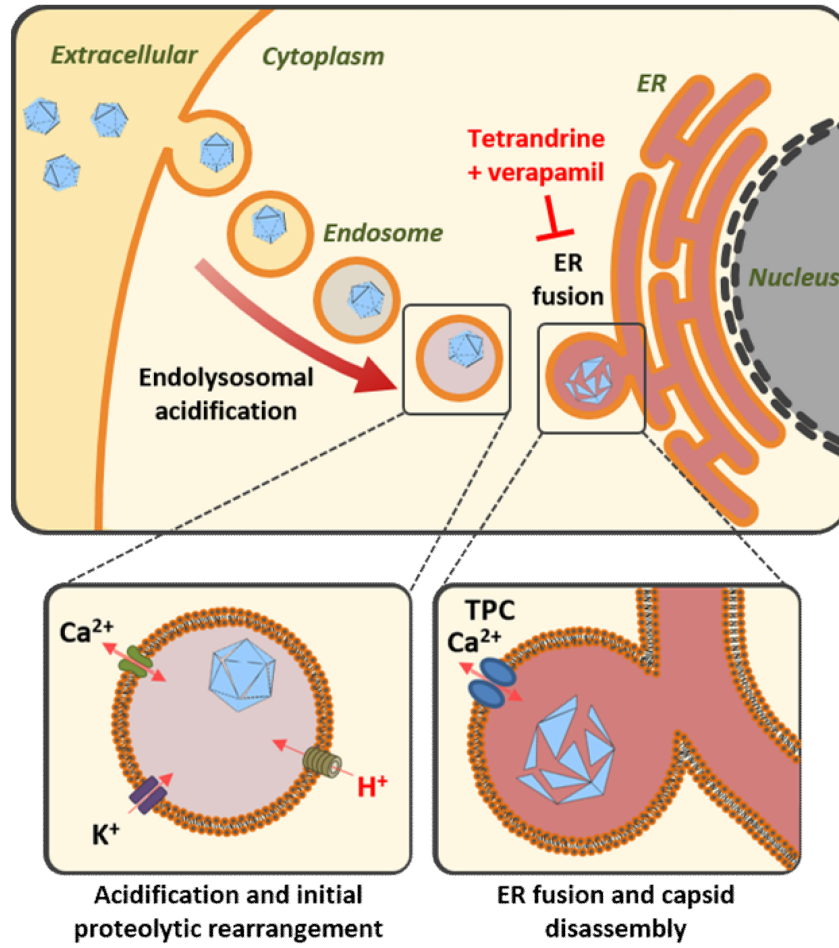

Source: http://biorxiv.org/content/10.1101/814681v1.full.pdf
